# Supplementary material for: Poly(ADP-Ribose) Polymerase Mediates Inflammation in a Mouse Model of Contact Hypersensitivity
Source: Springer Nature journal article supplement (doi:10.1038/jid.2008.196), 2008-07-17
Supplement: jid2008196x3.pdf [file jid2008196x3.pdf]

## **Cytochemical Staining for Peroxidase Activity in Tissue Sections<sup>1</sup>**

6 µm thick sections embedded in Cryochrome Blue matrix (*Shannon*, Pittsburgh, PA, USA) were used. A fresh mixture of solution A (0.8 mM diaminobenzidine – tetrahydrochloride; 121 mM Na-acetate in distilled water) and solution B (1.8 mM hydrogen-peroxide in distilled water) in 50:1 ratio was applied onto the sections. The reaction was developed for 10 minutes at room temperature. Slides were washed twice in distilled water and were counterstained with Nuclear Fast Red (*Vector Laboratories*, Burlingame, CA, USA) for 1 min at room temperature. Slides were washed in water, dehydrated and mounted (*Hypermount*, Shandon).

<sup>1</sup>Modified from: Krutsay, M: *Pathológiai technika (Techniques in pathology) in Hungarian Medicina*, Budapest, Hungary, 1999, pp. 274-275. ISBN 963 242 434 4
