# Supplementary figures and images for: Poly(ADP-Ribose) Polymerase Mediates Inflammation in a Mouse Model of Contact Hypersensitivity
Source: Springer Nature journal article supplement (doi:10.1038/jid.2008.196), 2008-07-17

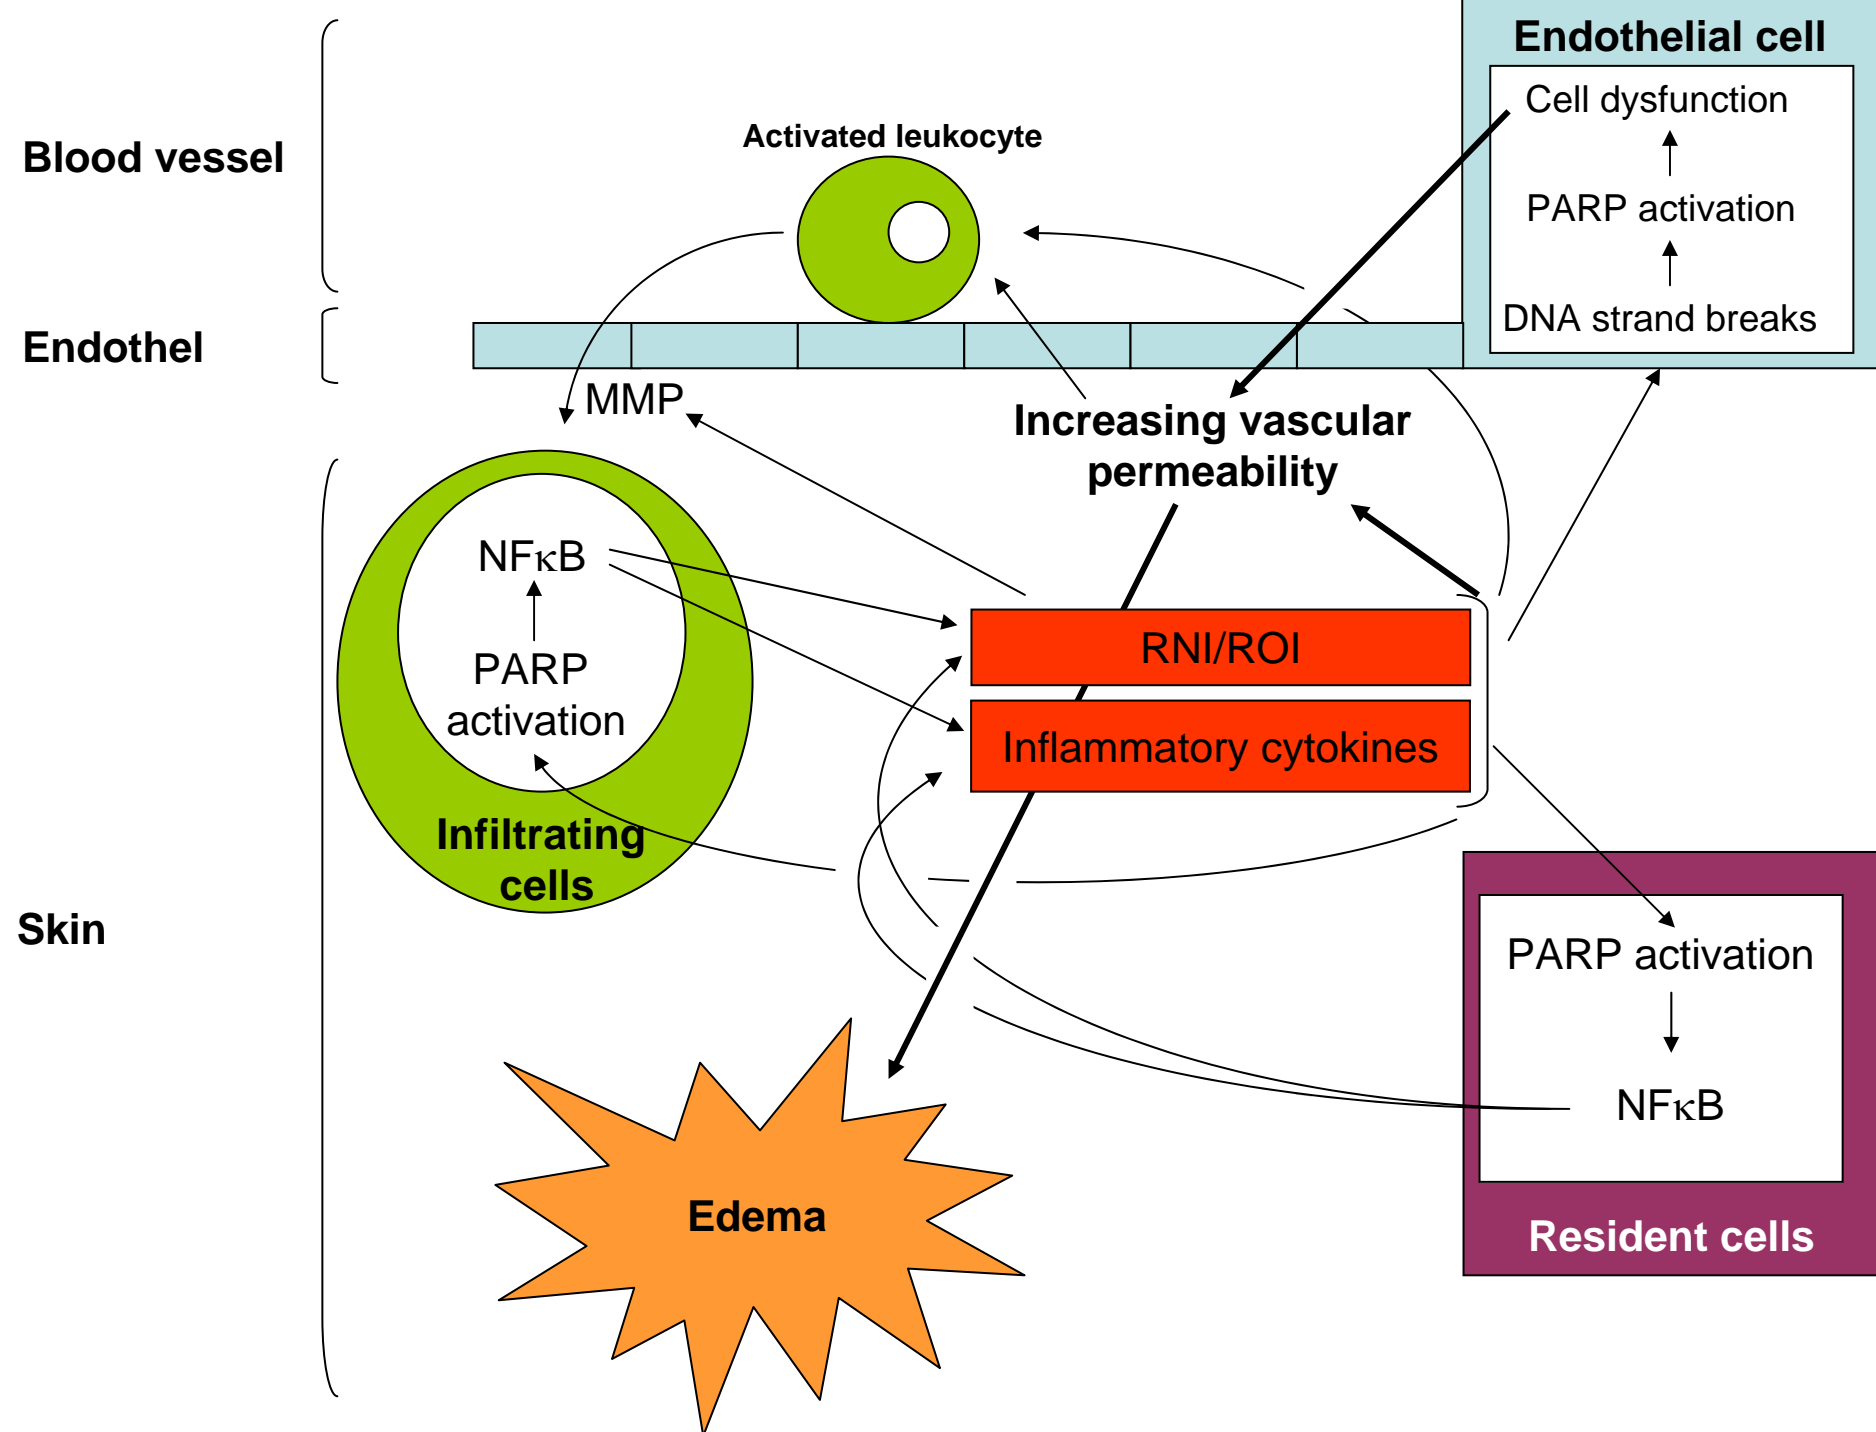

Supplement: jid2008196x2.pdf [file jid2008196x2.pdf]
